# Supplementary material for: Circulating Malondialdehyde Concentrations in Obstructive Sleep Apnea (OSA): A Systematic Review and Meta-Analysis with Meta-Regression
Source: MDPI journal article supplement (doi:10.3390/antiox10071053), 2021-06-29
Supplement: s1 [file s1]

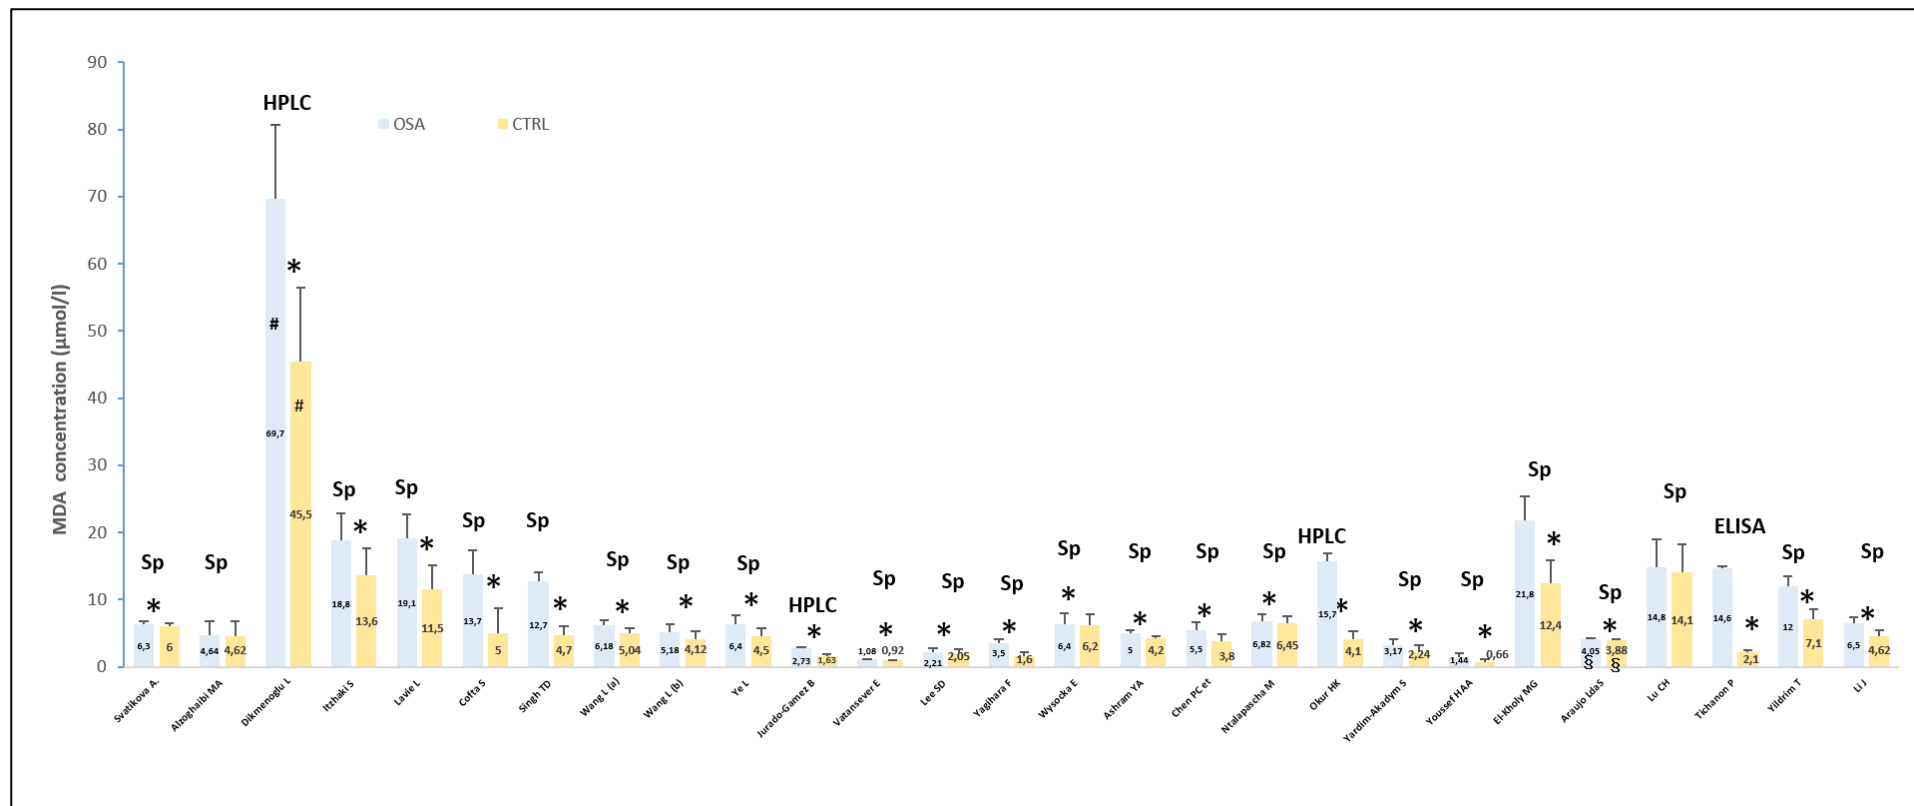

Supplementary Figure S1. Bar chart showing MDA concentrations means in OSA patients and controls in the studies included in the meta-analysis. The assay type used is indicated above the bars.

Sp: spectrophotometric. ELISA: enzyme-linked immunosorbent assay; HPLC: High Performance Liquid Chromatography.

\* Statistical significance in presence of  $p < 0.05$ ;

# nmol/l;

§ng/ml.
